1           **“*mir152* hypomethylation, potentially triggered by embryonic hypoxia, as a**  
2 **common mechanism for non-syndromic cleft lip/palate”**

3

4

5           Authors: Lucas Alvizi<sup>1</sup>, Luciano Abreu Brito<sup>1</sup>, Bárbara Bischain<sup>1</sup>, Camila Bassi  
6 Fernandes da Silva<sup>1</sup>, Sofia Ligia Guimaraes Ramos<sup>1</sup>, Gerson Shigeru Kobayashi<sup>1</sup>, Jaqueline  
7 Wang<sup>1</sup>, Maria Rita Passos-Bueno\*<sup>1</sup>

8           \* corresponding author

9           <sup>1</sup> Centro de Pesquisas sobre o Genoma Humano e Células Tronco, Universidade de  
10 São Paulo, Brasil.

11

12           **Abstract**

13

14           Non-syndromic cleft lip/palate (NSCLP), the most common human craniofacial  
15 malformations, is a complex disorder given its genetic heterogeneity and multifactorial  
16 component revealed by genetic, epidemiological and epigenetic findings. Association of  
17 epigenetic variations with NSCLP has been made, however still of little functional investigation.  
18 Here we combined a reanalysis of NSCLP methylome data with genetic analysis and used both  
19 *in vitro* and *in vivo* approaches to dissect the functional effects of epigenetic changes. We found  
20 a frequent differentially methylated region in *mir152*, hypomethylated in NSCLP cohorts (21-  
21 26%), leading to *mir152* overexpression. *In vivo* analysis using zebrafish embryos revealed that  
22 *mir152* upregulation leads to craniofacial impairment analogue to palatal defects. Also, we  
23 demonstrated that zebrafish embryonic hypoxia leads to *mir152* upregulation combined with  
24 *mir152* hypomethylation and also analogue palatal alterations. We therefore suggest *mir152*  
25 hypomethylation, potentially induced by hypoxia in early development, as a novel and frequent  
26 predisposing factor to NSCLP.

## 27 Introduction

28

29 Non-syndromic cleft lip/palate (NSCLP) is the most common craniofacial congenital  
30 malformation in humans, affecting 1:700 live-births worldwide, and follows a multifactorial model  
31 of inheritance<sup>1-3</sup>. Genetic contribution to NSCLP has long been supported by several  
32 independent studies, which has shown heritability estimates as high as 78-91% in Asian,  
33 European and Brazilian populations<sup>4-6</sup>. Genomic analyses have successfully revealed several  
34 at-risk common genetic variants, in distinct populations. Nevertheless, they confer a small risk,  
35 and explain 10-30% of the disease's heritability<sup>7,8</sup>. In addition, an increasing number of rare  
36 pathogenic variants has also been identified in families segregating NSCLP, but the extent of  
37 their contribution in overall NSCLP cases is uncertain; importantly, no shared prevalent genetic  
38 basis has been observed for these variants<sup>9-14</sup>, except for mutations in the Epithelial Cadherin-  
39 p120-Catenin Complex, which are responsible for 2-14% of familial NSCLP cases<sup>15</sup>. Given the  
40 lack of a common mechanism underlying a large proportion of cases, projections for strategies  
41 of prevention and development of predictive diagnostic tests in at-risk couples have been  
42 currently hindered.

43 In parallel with genetic studies, epidemiological studies have suggested the influence of  
44 several environmental factors predisposing to NSCLP<sup>16-23</sup>. In this sense, recent progress on  
45 uncovering the epigenetic contribution to NSCLP have been made<sup>24-27</sup>. Epigenetic variations  
46 (or epivariations) are dynamic, functional and inheritable covalent changes in DNA and/or  
47 chromatin associated proteins which do not alter DNA sequence, yet they can affect gene  
48 expression and contribute to phenotypic variability and disease<sup>28-33</sup>. Association of genomic  
49 epivariations to phenotypes, so called Epigenome-wide association studies (EWAS), have been  
50 expanding the knowledge on phenotypic variability and disease molecular mechanisms for the  
51 past years<sup>30,31,34-41</sup>. More recently, individual-specific methylome analysis has shed light on  
52 epigenetic variation relevant to disease, demonstrating how this approach can uncover

53 molecular alteration for complex traits<sup>42</sup>. Here, we attempted to identify both group and  
54 individual-specific methylation changes using previously published methylome data on NSCLP.  
55 We identified individual methylation changes in known NSCLP candidate regions and also  
56 *mir152* hypomethylation in 26% of our discovery cohort. This result was replicated in an  
57 independent cohort and validated through functional *in vitro* and *in vivo* assays. Finally, we  
58 demonstrated how hypoxia, a known environmental risk factor for NSCLP, can modulate such  
59 changes.

60

## 61 **Results**

62

63 *mir152 is a frequent differentially methylated region in the Brazilian NSCLP cohort*

64

65 We conducted differential methylation analysis at the gene level using the whole  
66 Brazilian NSCLP 450K dataset (66 NSCLP vs 59 controls<sup>24</sup>, and looked for the top 5 DMRs  
67 ranked by RnBeads, which combines adjusted p-value to methylation difference and  
68 methylation quotient. Those top DMRs were, in order of ranking: top 1, an intronic region of  
69 *CROCC* at 1p36.13; top 2, an intronic region of *FAM49B* at 8q24.21; top 3, an intronic region of  
70 *NLK* at 17q11.2; top 4, a non-coding region comprising *mir152* at 17q21.32; and top 5, an  
71 exonic region of *PRAC2* and comprising *mir3185* also at 17q21.32 (Figure 1a; Supplementary  
72 Table 2). Among those genes, *mir152* (adjusted p-value= 8.20E-06, beta-difference = -0.04)  
73 was the only with enriched expression during palatal embryogenesis in human and mouse,  
74 according to Sysface (Systems tool for craniofacial expression-based gene discovery) online  
75 tool. Moreover, *mir152* has already been identified as a DMR during normal murine palatal  
76 development<sup>53</sup> and suggested as a central regulator of downstream mRNAs encoding proteins  
77 known to play pivotal roles in orofacial development<sup>54</sup>, however still with no clear evidence of  
78 association with NSCLP. Concurrently, we also conducted a differential methylation analysis at

79 the gene level comparing individually each one of the 66 NSCLP samples versus all 59 controls  
80 (“450k cohort”), looking for individual epivariation. We found a total of 6620 gene DMRs  
81 (average = 100.3 DMRs per sample) in all NSCLP samples with >5% methylation difference and  
82 adjusted p-value<0.05 (Supplementary Table 3).

83

84 *mir152* was the most frequent DMR (n=17 NSCLP samples; ~26%) with ~6% of  
85 average hypomethylation difference (beta-value reduction) in comparison to controls and was  
86 not present in previous published data on common epivariation <sup>42</sup>.

87

88 *mir152* methylation validation in other cohorts

89

90 To validate the previous findings, we investigated *mir152*, 8q24.21 and 1p36.13 DMRs in  
91 an independent Brazilian cohort of 57 NSCLP samples and 130 control samples, using a  
92 different method for DNA methylation quantification (BSAS). 8q24.21 and 1p36.13 DMRs were  
93 included in the validation step as both regions have been associated with NSCLP <sup>7,55,56</sup>. We  
94 observed no correlation of potential confounding factors (bisulfite conversion batch, PCR batch,  
95 age, sex or origin; Supplementary Figure 1a-e) with BSAS methylation data. Besides, principal  
96 component analysis (PCA) did not reveal any evidence of sample stratification which could bias  
97 methylation variation in our cohort (Supplementary Figure 1f).

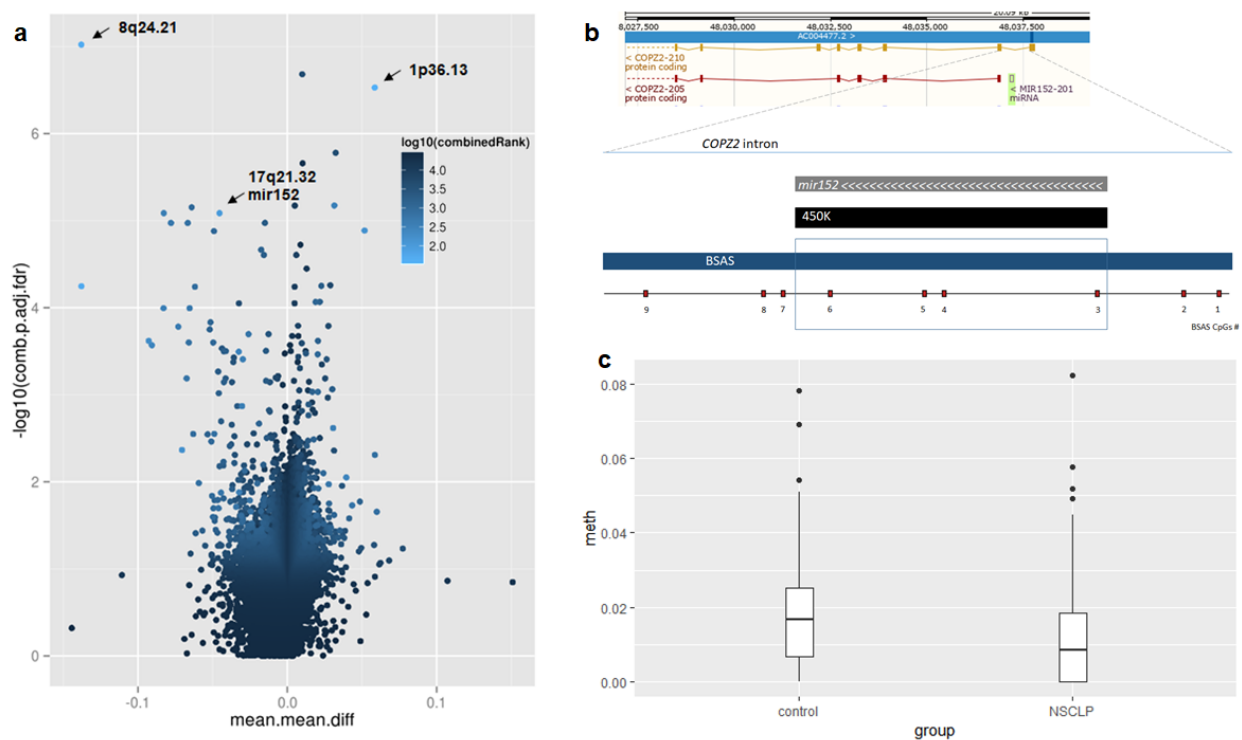

98

99

**Figure 1:** mir152 is differentially methylated in NSCLP cohorts. **a.** Volcano plot of 100 differentially methylated regions (DMRs) at the 450K cohort. Light blue spots are the best 101 ranked DMRs by a p-value, methylation difference and quotient of difference by RnBeads. 102 Arrows indicate DMRs at 8q24.21, 1p36.13 and mir152. **b.** Scheme of mir152 DMR and 103 analysed CpGs at the independent cohort (BSAS – Bisulfite amplicon sequencing cohort). 104 CpGs 3, 4, 5, and 6 are within mir152 gene body and 450K DMR. **c.** mir152 is significantly 105 hypomethylated at the BSAS cohort. Boxplots with central lines as medians. P-value= 0.005 106 (Mann-Whitney's test).

107

108

109

110

111

112

We found no significant methylation differences at either 8q24.21 (average beta-value 109 controls= 0,9792; NSCLP= 0,9725; p=0.41, Mann-Whitney's test) and 1p36.13 (average beta- 110 value controls= 0,1279; NSCLP=0,1225, p=0.08, Mann-Whitney's test) DMRs in the replication 111 cohort. However, we found significant hypomethylation at the *mir152* DMR (comprising CpGs 3, 112 4, 5 and 6) in NSCLP in comparison to controls (p=0,005, Mann Whitney test; Figure 1b-c),

113 corroborating our initial findings. To investigate *mir152* hypomethylation at individual NSCLP  
114 samples in this independent cohort, we computed those samples with complete  
115 hypomethylation (average beta-values at CpG sites 3, 4, 5 and 6 = 0) (Supplementary Table 1).  
116 Considering the *mir152* DMR, we found hypomethylation at 16 NSCLP samples (28%) and 17  
117 control samples (13%), which represents a hypomethylation enrichment of 15% ( $p=0.02$ ,  
118 Fisher's Exact Test). Also, when we considered each CpGs within *mir152* DMR independently,  
119 we found hypomethylation enrichment at CpG 3 (18%), CpG 4 (14%), CpG 5 (16%), CpG 6  
120 (21%) and the adjacent CpG 7 (12%). Correlation analysis of methylation levels from all 9  
121 *mir152* CpGs revealed a trend of hypomethylation shared by CpGs 4, 5, 6 and 7 and mild  
122 correlation values (Supplementary Figure 2a-b), which could be indicative of a more cohesive  
123 methylation block at those sites. Taken together, our results corroborate *mir152*  
124 hypomethylation in both Brazilian NSCLP cohorts.

125         Attempting to evaluate *mir152* methylation contribution to NSCLP in an independent and  
126 different population, we looked for other NSCLP methWAS available data. Using summary  
127 statistics data from an available NSCLP case-control methWAS performed on 182 hispanic and  
128 non-hispanic samples (94 NSCLP and 88 controls<sup>27</sup>), we did not found significant differences  
129 at the *mir152* DMR here studied. On the other hand, we found a CpG site at *mir152* promoter  
130 hypermethylated in NSCLP in this cohort (cg06598332,  $p=0.04$ ), which is located at ~200bp  
131 upstream *mir152* DMR.

132

133 *Epivariation is not mediated by genetic variation at mir152 region*

134

135         Because genetic variation can influence nearby epivariation<sup>57,58</sup>, we looked for single  
136 nucleotide variants (SNV) within the *mir152* DMR. The only polymorphism revealed by Sanger  
137 sequencing, rs12940701 (C>T), was present in 30,39% of NSCLP and 41,46% of control  
138 samples, with no significant difference between groups (Fisher's exact test =0,08). Rs12940701

139 coincides with CpG site 8 at *mir152* DMR, which displays low methylation levels in both NSCLP  
140 and control samples (NSCLP average beta-value= 0.0178, controls average beta-  
141 value=0.0121). Even though rs12940701 has been suggested as a potential variant diminishing  
142 methylation levels at *mir152* region<sup>59</sup>, we observed no genotype vs. methylation correlation in  
143 our replication cohort ( $p=0.1843$ , Supplementary Figure 2d). Also, we found no linkage  
144 disequilibrium between this SNV and rs1838105, a 1.3Mb apart SNV previously associated with  
145 NSCLP at 17q21.32 (Yu et al., 2017; Supplementary Figure 2c). Rare variants (minor allele  
146 frequency < 0.5%) at *mir152* gene were not analysed in this cohort (data not shown). Attempting  
147 to verify whether rare variants at *mir152* region could segregate in independent NSCLP familial  
148 cases, we analysed the exome of 36 affected individuals from 11 families, but neither common  
149 nor rare variants were found.

150

### 151 *Methylation variation at mir152 regulates gene expression*

152

153 We next verified whether methylation variation within *mir152* DMR would be functional  
154 and interfere in *mir152* expression. To achieve that, we carried out a CRISPR-Cas9-based  
155 approach for targeted demethylation, in which dCas9 were fused to TET1 (pPlatTET-GFP) in  
156 order to demethylate specific genomic targets<sup>48</sup>. Among the three tested sgRNAs (sgRNA-1,  
157 sgRNA-2 and sgRNA-3) targeting the *mir152* DMR in hek293T cells, sgRNA-3 efficiently  
158 reduced methylation levels at *mir152* DMR at sites 1, 4, 5 and 8 (average beta-value pPlatTET-  
159 sgRNA-3 = 0.54, beta-value pPlatTET-NC= 0.76, beta-value NC =0.80; Figure 2a). In non-  
160 transfected conditions, or when transfected with the empty vector (pPlatTET-NC) or sgRNAs-1  
161 and 2, hek293T do not normally express *mir152*. On the other hand, consistently with those  
162 methylation changes, we observed a high upregulation of *mir152* RNA levels when sgRNA-3  
163 transfections were carried out (Figure 2b). Taken together, those results indicate that  
164 epivariation at those sites are functional, resulting in *mir152* expression changes.

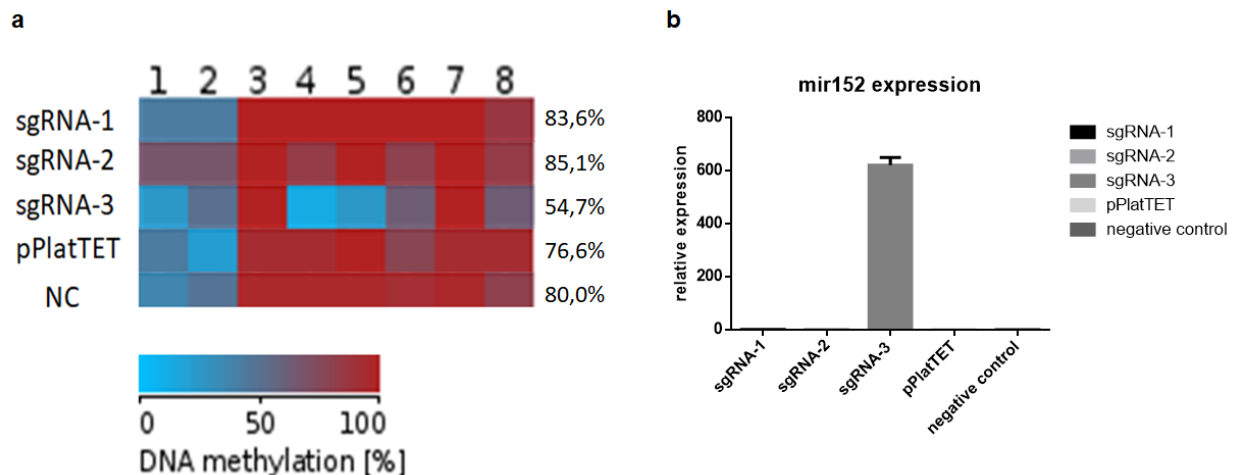

165

166 **Figure 2.** DNA methylation changes at mir152 DMRs results in mir152 expression changes. **a.**

167 A cas9 based approach for target demethylation using the vector pPlatTET and 3 single-guide

168 RNAs sequences (sgRNA 1, 2 and 3) for mir152 DMR in hek293T cells. sgRNA-3 efficiently

169 reduces mir152 methylation, especially at CpGs 4 and 5, in comparison to the empty vector

170 transfection (pPlatTET) and non transfected cells (NC). CpG 9 is absent in hek293T cells due a

171 single nucleotide polymorphism. Total percentage of methylation is represented with values at

172 the right **b.** DNA hypomethylation induces mir152 overexpression in hek293T cells. mir152

173 expression is absent in all other conditions.

174

175 *mir152 mimics results in craniofacial malformation in zebrafish*

176

177 We attempted to investigate whether *mir152* expression could influence craniofacial

178 development. To model that, we injected miRNA inhibitor and mimics in 1-cell stage zebrafish

179 embryos and observed their development at 24hpf and 5dpf. When injected with *mir152*

180 inhibitor, embryos developed normally with no obvious development impairment (Figure 3a).

181 However, when injected with mimics, zebrafish embryos presented several craniofacial defects

182 at 5dpf including malformation of Meckel's, palatoquadrate, ceratobranchial and the ethmoidal



183 plate, which is the embryo's analogue palate. Seventy percent (70%) of embryos were affected,  
184 which were classified as mildly affected (28,5%), comprising those embryos with ethmoidal  
185 plate's defects in size and shape, and severely affected (41,5%), characterized by a typical cleft  
186 at the ethmoidal plate.(Figure 3a). On the other hand, co-injection of *mir152* mimics and inhibitor  
187 led to non-affected embryos (n= 65) (Figure 3a).

188

189 *mir152 targets dnmt1 and cdh1 in zebrafish neural crest cells*

190

191 Several coding genes are predicted to be targeted by *mir152*, including *DNMT1*, which  
192 has been experimentally confirmed<sup>59-62</sup>. In that case, *mir152* is known to control a  
193 *DNMT1/CDH1* loop, in which *mir152* upregulation leads to *DNMT1* downregulation and as a  
194 consequence *CDH1* expression is present<sup>60</sup>. Therefore, we checked for *DNMT1* and *CDH1*  
195 expression differences in pPlatTET-GFP transfected hek293T cells or mimics/ inhibitor injected  
196 zebrafish embryos. We did not observed *DNMT1/dnmt1* or *CDH1/cdh1* expression changes in  
197 any sgRNA transfected hek293T cells or in *mir152* mimics/ inhibitor injected zebrafish whole  
198 embryos RNA (Supplementary Figure 3). Because whole embryo expression could mask tissue-  
199 specific changes and given the extent of observed craniofacial impairment in injected embryos  
200 we hypothesized that neural crest cells (NCCs) would be the most likely cells to be affected by  
201 *mir152* dysregulation. To test that, *mir152* mimics/ inhibitor injected embryos were dissociated  
202 at 24hpf and sox10-GFP positive were sorted for *dnmt1* and *cdh1* expression analysis. We  
203 observed an ablation of *dnmt1* and *cdh1* expression in sox10-GFP positive cells when *mir152*  
204 mimics was injected and no effects on *dnmt1* or *cdh1* expression in inhibitor or mimics+inhibitor  
205 injections (Figure 3b).

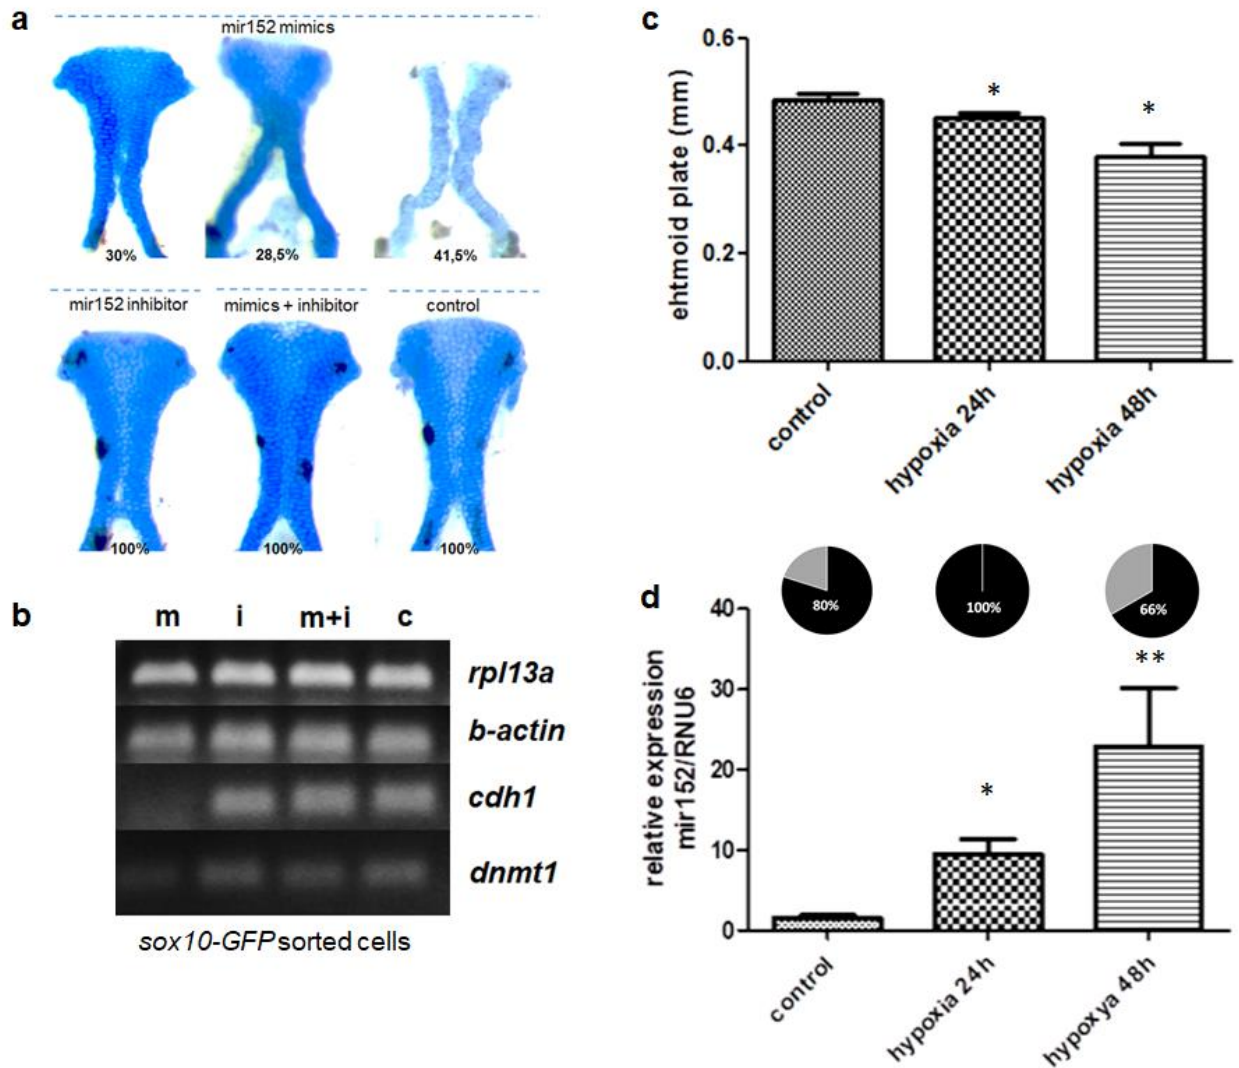

206

207

208

209

210

211

212

213

214

215

**Figure 3.** mir152 mimics injected in zebrafish embryos causes ethmoidal plate defects

analogue to clefts. **a.** ethmoidal plates dissected from 5dpf zebrafish larvae injected with mir152 mimics (superior) and mir152 inhibitor, mir152 mimics + inhibitor and non injected controls (inferior). Mir152 mimics injections resulted in 30% of larvae with non-affected ethmoid plate (left), 28,5% of larvae with mildly-affected ethmoid plate (central) and 41,5% of larvae with severe affected structures, including a cleft ethmoid plate (right). mir152 mimics injected embryos N= 49. Both mir152 inhibitor injections and mimics + inhibitor combined injections resulted in no altered craniofacial structures with 100% of larvae with normal ethmoid plates. mir152 inhibitor injected embryos N=40; mimics+inhibitor injected embryos N=65. Control

216 embryos N=107. **b.** RT-PCR of *cdh1* and *dnmt1* in mimics and inhibitor injected embryos.  
217 *mir152* mimics injection resulted in *cdh1* and *dnmt1* downregulation. *cdh1* expression is not  
218 detected in *mir152* mimics injected embryos (m) in comparison to *mir152* inhibitor injection (i),  
219 mimics+inhibitor injection (m+i) and non-injected controls (c). *rpl13a* and *b-actin* were used as  
220 endogenous controls. **c.** zebrafish embryos in hypoxia (1% oxygen) for both 24h and 48h  
221 starting at 2-cell stage presented significant reduction in ethmoid plate's size ( $p > 0,05$ , t-test). **d.**  
222 *mir152* expression significantly increases under hypoxia conditions for 24h or 48h. ( $*p < 0,05$  ;  
223  $**p < 0,005$ ). At the top, pie charts of *mir152* methylation levels in zebrafish embryos during  
224 normal and hypoxia conditions: controls = 80%, hypoxia 24h = 100% and hypoxia 48h = 66%.

225

226 *Hypoxia drives mir152 hypomethylation and expression changes during development and*  
227 *affects craniofacial development*

228

229 *mir152* expression induction has been reported in cells subjected to hypoxia<sup>61</sup> and  
230 hypoxia is a known clefting factor in mice and has also been reported to induce ethmoid plate  
231 defects in zebrafish<sup>63-65</sup>. We then hypothesised hypoxia as an environmental factor leading to  
232 *mir152* hypomethylation, which in turn would cause up-regulation of *mir152*, resulting in  
233 craniofacial malformation. We then first exposed zebrafish embryos to hypoxia (1% O<sub>2</sub>) for 24h  
234 or 48h and obtained 5dpf embryos with reduced ethmoid plate size (Figure 3c). By quantifying  
235 *mir152* levels in such conditions, we observed that hypoxia induced a significant up-regulation  
236 of *mir152* in comparison to normoxia (up to ~20 fold, Figure 3d). *mir152* methylation changes in  
237 hypoxia were also tested and we observed hypomethylation of *mir152* methylation levels from  
238 80% at normoxia conditions, 100% at hypoxia for 24h and 66% at hypoxia for 48h (Figure 3d).  
239 Therefore we consider that hypoxia was capable of reducing *mir152* methylation at least in 14%  
240 for a 48h hypoxia treatment.

241

## 242 Discussion

243

244 The study of epivariation on several diseases, especially methylome analysis, have  
245 been gaining force in the past five years <sup>24,25,27,36,37,42,66,67</sup>. In the case of NSCLP, methWASs  
246 have demonstrated the association of methylation changes in genes belonging to Epithelial-to-  
247 mesenchymal transition (EMT) pathway and also methylation changes associated to cleft  
248 subtypes <sup>24,26</sup>. Whether such epigenetic changes are associated with genetic variation and/or  
249 environment is still an open question which we attempted to address in this work. Since  
250 environment significantly impacts epigenetic variation <sup>68</sup>, those findings suggest that, in spite of  
251 the high genetic contribution to those phenotypes, environment plays an important role in their  
252 aetiology.

253 By reanalyzing previously published data, we were able to identify *mir152* as a new  
254 candidate NSCLP gene in up to 26% of NSCLP samples with DMR hypomethylated. e also  
255 confirmed hypomethylation of *mir152* in 15%-21% of NSCLP samples in an independent  
256 Brazilian cohort. These findings corroborate our initial findings and suggests a common  
257 epivariation at *mir152* for NSCLP, which is one of the most frequent alteration so far associated  
258 with NSCLP, at least in our population. We also found significant *mir152* promoter methylation  
259 differences using methWAS data from a different population <sup>27</sup>, which suggest that not only  
260 epivariation at *mir152* gene body could be associated with NSCLP but also at the promoter  
261 region. We believe therefore that epivariation at *mir152*, both at promoter or gene body, is  
262 associated with NSCLP. We could not replicate, however, 8q24.21 or 1p36.13 DMRs in this  
263 independent cohort. Methylation differences at 8q24 in NSCLP have been previously reported  
264 <sup>27</sup>, although in a different region than 8q24.21 DMR, more specifically at 8q24.23 *HEATR7A*.  
265 Therefore we do not know whether such methylation changes at 8q24 are dependent on each of  
266 the studied population or their effects are smaller for detection in our independent cohort.

267 *mir152* is a member of the *mir148/mir152* family and is located within an intron of  
268 *COPZ2* at chromosome 17q21.32, a genomic region previously associated with NSCLP by  
269 GWAS, however with *WNT9B* as the principal candidate gene <sup>7</sup>. Attempting to identify if *mir152*  
270 variation could add to the NSCLP GWAS signals at 17q21.32, we also looked at LD data from  
271 1000 genomes and found that both genes were not in LD. Still, we here show that regions  
272 previously associated with NSCLP by genetic approaches can also be prone to epigenetic  
273 changes as previously reported <sup>27</sup>.

274 Because genetic variation can modulate DNA methylation within a region <sup>57,69,70</sup>, we  
275 investigated whether common genetic variation could modulate methylation changes at *mir152*.  
276 Our results suggested that neither common nor rare variants at *mir152* region contribute to  
277 *mir152* epivariation as a methylation QTL (meQTL) in the cohort here studied. In fact, *mir152*  
278 processed sequence is highly conserved and identical from fish to mammals <sup>71</sup>, indicating that  
279 either its function has been conserved during evolutionary diversification and/or genetic  
280 variation at that region is not tolerated. We cannot rule out that genetic variation in the promoter  
281 region of *mir152* or out of the analysis region, which is not covered in our Sanger sequencing  
282 and exome analysis, could lead to expression variability. Further, we also cannot exclude that  
283 other tissues than the here studied could display a meQTL status for rs12940701.

284  
285 To determine the functional effects of *mir152* hypomethylation in gene expression, we  
286 induced a cas9-mediated demethylation of *mir152* in hek293T cells, and showed that *mir152*  
287 hypomethylation leads to *mir152* upregulation in human cells. Importantly, the major methylation  
288 changes were made at CpGs 4 and 5, the core of *mir152* DMR, which coincides with the CpG  
289 sites bearing higher methylation correlation. Therefore the findings on *mir152* hypomethylation  
290 at both 450K and the independent cohorts are likely functional.

291 Once we found *mir152* hypomethylation to promote *mir152* upregulation, we mimetized  
292 *mir152* upregulation in zebrafish development by *mir152* mimics injections. *mir152* upregulation

293 led to several craniofacial defects compatible with clefting phenotypes, grouped in two severity  
294 degrees:: mid-affected and severely-affected zebrafish larvae at 5dpf. We speculate that the  
295 extension of those phenotypes are dose dependent, because micro-injection of zebrafish  
296 embryos can vary in precision of oligonucleotides incorporation by the embryo cells. It is  
297 important to note that such observed phenotype were specific to *mir152*-mimics injection,  
298 compatible with a *mir152* upregulation scenarium, once both inhibitor and mimics + inhibitor  
299 injections resulted in no affected embryos.

300 Functional studies have demonstrated *mir152* as an important modulator of TGFbeta-  
301 induced EMT in epithelial cells, in which *mir152* overexpression is known to inhibit TGFbeta and  
302 therefore EMT <sup>72</sup>. It has also been shown that upregulation of *mir152* targets *DNMT1*, which in  
303 turn controls *CDH1* expression via DNA methylation and therefore affecting E-cadherin levels  
304 and EMT in breast cancer cells <sup>60</sup>. Interestingly, *CDH1*/E-cadherin loss-of-function mutations  
305 have been found in both syndromic and nonsyndromic clefting forms and *CDH1* promoter  
306 hypermethylation have been found in association with cleft penetrance in NSCLP families <sup>13,24,73</sup>.

307 In this study, We observed a reduction of both *dnmt1* and *cdh1* expression in *mir152*  
308 mimics-injected sox10-GFP NCCs suggesting that this control can be specific at certain cell  
309 types, more specifically NCCs. Even more interestingly and opposite to what has been  
310 described by other works, which reported *mir152* upregulation accompanied by *dnmt1*  
311 downregulation and *cdh1* upregulation, we found total reduction of *cdh1* expression when  
312 *mir152* mimics was injected. We do not know if this effect is related to *dnmt1* or to other targets  
313 of *mir152* in this cell population; nevertheless loss of *CDH1* expression is compatible with *CDH1*  
314 related molecular pathology in NSCLP families <sup>13,73,74</sup> and *cdh1* downregulation in NCCs has  
315 been reported to inhibit NCC migration in *Xenopus* <sup>75</sup>. Therefore, given the effects of *mir152*  
316 upregulation on gene expression of sox10-GFP positive cells our results suggest that aberrant  
317 expression of *mir152* during development affects proper craniofacial formation by disrupting  
318 neural crest specification/EMT and its derivatives

319           While the vast majority of studies on NSCLP etiology states the multifactorial scenarium  
320 for NSCLP, in which both genome and environment play a role, knowledge on how they interact  
321 and which effects NSCLP associated environmental factors have on genome behavior and,  
322 more specifically, on the epigenome is scarce. Here we hypothesised that such hypomethylation  
323 and consequently upregulation of *mir152* was potentially caused by embryonic hypoxia.  
324 Hypoxia is a normal condition during several steps of mammalian development required for  
325 proper cell differentiation and progression <sup>76</sup>, however abnormal oxygen levels below the foetal  
326 hypoxia limits can lead to malformations and disease <sup>77-79</sup>. Regarding oral clefts and craniofacial  
327 development, hypoxia has been for a long time demonstrated as a strong risk environmental  
328 factor in mice, rat and chicken models <sup>64,65,80-82</sup> and also hypoxia-related environmental factor  
329 are epidemiologically associated to NSCLP <sup>16,18,20,63,83,84</sup>. More recently, a hypoxia induced  
330 clefting model in zebrafish has been demonstrated <sup>63</sup> reinforcing the effect of hypoxia on  
331 craniofacial development and supporting our model. In agreement with this study, our hypoxia  
332 exposure in zebrafish embryos also resulted in aberrant ethmoid plate sizes and in increased  
333 *mir152* expression accompanied by *mir152* hypomethylation at 48h of hypoxia. Our work  
334 therefore links an epigenetic alteration in NSCLP to a potential environmental factor,  
335 contributing to the multifactorial model proposed to this malformation.

336           In summary, we demonstrated how individual methylome analysis in NSCLP can  
337 indicate individual specific methylation changes potentially relevant to phenotype. In that case,  
338 we found *mir152* hypomethylated in 26% of our cohort and replicated this finding in 21% of the  
339 cases on an independent NSCLP cohort. Methylation changes at *mir152* result in expression  
340 changes and *mir152* upregulation during development leads to impairment of craniofacial  
341 development and maternal/foetal hypoxia might be the environmental link leading to *mir152*  
342 epivariation. We suggest therefore *mir152* as a novel candidate locus for NSCLP, expanding the  
343 current knowledge on NSCLP aetiology and molecular mechanisms.

344

345 **Methods**

346

347 *Ethics*

348

349 This study was approved by the Ethics Committee of the Instituto de Biociências  
350 (Universidade de São Paulo, Brazil). Biological samples were collected after signed informed  
351 consent by the parents or legal guardians. All experiments were performed in accordance with  
352 relevant guidelines and regulations.

353

354 *Affected individuals and controls samples*

355

356 For methylome analysis, we used previously published and public data <sup>24</sup>, which briefly  
357 consisted of Illumina Infinium HumanMethylation 450K data of blood-derived DNA from 66  
358 cases from non-familial NSCLP individuals and 59 age and sex-matched controls from healthy  
359 individuals (hereafter named as “450k cohort”). Our replication cohort consisted of 57 non-  
360 familial NSCLP and 130 controls samples which were ascertained either at the Hospital das  
361 Clínicas of Universidade de São Paulo (São Paulo, Brazil), Centro de Pesquisas Sobre o  
362 Genoma Humano e Células-Tronco of Universidade de São Paulo (São Paulo, Brazil) or during  
363 missions of Operation Smile Brazil (Supplementary Table 1). Samples from replication cohort  
364 were saliva-derived DNA collected with Oragene (DNA Genotek) and genomic DNA extracted  
365 as recommended by the fabricant.

366

367

368 *450K methylome analysis*

369



370 To identify differentially methylated regions (DMRs) at the gene level in NSCLP samples,  
371 we first compared all 66 NSCLP samples versus all 59 controls (450K cohort) using the  
372 RnBeads pipeline, which comprises filtering, normalisation and differential methylation steps <sup>43</sup>.  
373 We filtered out probes affected by SNPs, on sex chromosomes, probes with a p-value detection  
374 >0.05 (GreedyCut) and probes with non-CpG methylation pattern. Data was normalised using  
375 the SWAN method. Principal component analysis (PCA) were also performed using R packages  
376 in order to identify obvious confounding effects in the 450K cohort. Differential methylation  
377 analysis was performed using the RefFreeEWAS method, which corrects p-values for blood  
378 cellular contributions, accounting for gene regions. We also used sex, age and probe markers of  
379 batch effects as covariates for differential methylation analysis p-value correction as previously  
380 described <sup>24</sup>. We used as selection criteria the 5 top ranked DMRs listed by RnBeads, which  
381 ranks DMRs combining adjusted p-values, methylation difference and quotient of difference. As  
382 a second step to identify individual contributions to the selected DMRs, we conducted analysis  
383 individually comparing each NSCLP sample versus all 59 controls using the same parameters  
384 above described. At this phase, we selected as DMRs those regions with p-value < 0.05 after  
385 FDR and covariate adjustment and with at least 5% beta-value difference. We also compared  
386 those DMRs with previously published data of frequent and common DMRs <sup>42</sup>. DMRs were  
387 listed by NSCLP sample and we checked for DMRs co-occurring in different NSCLP samples.

388

### 389 *Bisulfite amplicon sequencing of mir152 in the replication cohort*

390

391 To quantify methylation levels at *mir152*, 8q24.21 and 1p26.13 DMRs in the replication  
392 cohort, we used the Bisulfite Amplicon Sequencing (BSAS) method as previously described <sup>24</sup>.  
393 In summary, BSAS relies on bisulfite PCR, library preparation and DNA sequencing with a NGS  
394 sequencer <sup>44,45</sup>. We designed bisulfite-specific PCR primers for those DMRs using the online  
395 tool MethPrimer (<http://www.urogene.org/methprimer/>) with reported recommendations to avoid

396 biased bisulfite PCR amplification<sup>46</sup>. The predicted amplicons in GRCh37/hg19 build for those  
397 DMRs are: *mir152* at chr17:46114502-46114660 (Forward sequence: 5'-CS1-  
398 GYGTTGTGTTYGTTGGGTG-3', Reverse sequence: 5'-CS2-  
399 AATCCAACCRGACCAAAAATCAACTA-3'); 8q24.21 at chr8:130876990-130877116 (Forward  
400 sequence: 5'-CS1-TATGGAATTGATTAATGAGGAAAAT-3', Reverse sequence: 5'-  
401 AAAACCTTRGATACATTACTAAAAA-3'); and 1p36.13 at chr1:17231171 -17231307 (Forward  
402 sequence: 5'-GGTGYGTYGAGATTTTGTAT-3', Reverse sequence: 5'-  
403 TTCCAATCTACTATTA AAAACCAT-3'). Samples from the replication cohort DNAs were  
404 submitted for bisulfite conversion using 1ug of DNA in the e EZ-96 Methylation Kit (Zymo  
405 Research). Converted DNA was used as a template for bisulfite-specific PCR with the  
406 HotStartTaq Plus (QIAGEN) standard protocol and amplicons were checked by agarose gel  
407 electrophoresis and by Bioanalyzer HiSensitivity DNA prior to library preparation. During the  
408 library preparation indexes were added in one PCR step for sample (Access Array Barcode  
409 Library, Fluidigm). Libraries were purified by Ampure XP Beads in a magnetic column and  
410 checked again in the Bioanalyzer HiSensitivity DNA for peak shift visualization. Finally libraries  
411 were submitted for sequencing with the MiSeq Reagent V3 Kit 150 bp single-ended run on a  
412 MiSeq Sequencer (Illumina). We performed de-multiplexing of sequences using the FASTX  
413 Barcode Splitter program in the FastX Toolkit R package  
414 ([http://hannonlab.cshl.edu/fastx\\_toolkit/](http://hannonlab.cshl.edu/fastx_toolkit/)). Following this, we filtered out reads of low quality,  
415 selecting only reads with at least 50% of bases with Q > 30 using the FASTQ Quality Filter  
416 program, also part of the FastX Toolkit R package. Next FASTQ files were converted to FASTA  
417 files using the FASTQ-to-FASTA program in the same package. For the quantification of  
418 methylation levels at the *mir-152* region we used the BiQAnalyzer HT software<sup>47</sup>, in which we  
419 applied quality filters as follows: minimal reference sequence identity to 90%, minimal bisulfite  
420 conversion rate of 90%, maximum of 10% gaps allowed in CpG sites and minimal of 10 reads of  
421 coverage. Following these parameters, we obtained average *mir152* region methylation level

422 per sample and also site methylation level within *mir152* region. To investigate hypomethylation,  
423 we calculated the controls' 10th percentile and computed NSCLP samples below this limiar.  
424 Frequencies were tested by expected in controls and observed in NSCLP using Chi-square test.  
425 Graphs were generated using R package ggplot2.

426

427 *Independent population NSCLP methylome data*

428

429 We used summary statistics data public available from an independent NSCLP case-  
430 control methylome study performed on 182 hispanic and non-hispanic individuals<sup>27</sup>. We looked  
431 for significant ( $p>0.05$ ) probes overlapping *mir152* region (cg02742085, cg05096161,  
432 cg05850656, cg06598332, cg09111258, cg10382221, cg10472567, cg21384971, cg24389730).

433

434 *Sequencing genetic variation and exome analysis at mir152 region*

435

436 For sanger sequencing we PCR amplified *mir152* region in replication cohort samples  
437 using primers forward 5'-TTCTGGGTCCGTTTGGAGTG-3' and reverse 5'-  
438 TCAAGGTCCACAGCTGGTTC-3' and Platinum Taq Polymerase Supermix. Amplicons were  
439 treated with ExoProStar (GE Healthcare Life Sciences) and then submitted to Sanger  
440 sequencing using the BigDye Terminator v3.1 Sequencing standard kit (Applied Biosystems).  
441 Next, sequencing products were purified using Sephadex G-50 (GE Healthcare Life Sciences)  
442 with MultiScreen Column Plates (Merck-Millipore) and finally submitted to capillary  
443 electrophoresis at the ABI 3730 DNA Analyser (Applied Biosystems). All reactions were  
444 performed using fabricant's recommended protocols. Variants in *mir152* were also analyzed in  
445 exome sequencing data of 36 NSCLP individuals belonging to 11 families, segregating the  
446 disorder under an autosomal dominant model with incomplete penetrance (Supplementary  
447 Figure X). Library preparation and exome capture were performed using: Illumina's TruSeq DNA

448 Sample Prep and Exome Enrichment kits (for families F617, F886, F2570, F3196 and F7614);  
449 Illumina's Nextera Rapid Capture Exome (for families F1843, F2848, F8418), and Agilent's Sure  
450 Select QXT Target Enrichment (F10950, F10955 and F11730). Library quantification was  
451 performed with NEBnext Library Quant Kit (New England Biolabs), prior to paired-end  
452 sequencing on HiScanSQ (Illumina; families F617, F886, F2570, F3196, F7614) or HiSeq 2500  
453 (Illumina; families F1843, F2848, F8418, F10950, F10955 and F11730) USA). Exome mean  
454 coverage per individual was 131x (49 SD). Sequence alignment to the hg19 reference genome,  
455 exome indexing, variant calling and variant annotation were performed, respectively, with  
456 Burrows-Wheller Aligner (BWA; <http://bio-bwa.sourceforge.net>), Picard  
457 (<http://broadinstitute.github.io/picard/>), Genome Analysis Toolkit package (GATK,  
458 <http://broadinstitute.org/gatk/>) and ANNOVAR (<http://www.openbioinformatics.org/annovar/>).

459

#### 460 *Site specific demethylation*

461

462 To functionally investigate the role of methylation variation at the *mir152* DMR, we used  
463 a CRISPR-Cas9 based approach in which a plasmid expressing a modified and catalytically  
464 inactive Cas9 (dCas9) were fused to the catalytic domain of TET1 with a co-expression system  
465 for sgRNA, allowing target specific demethylation<sup>48</sup>. We obtained plasmid pPlatTET-gRNA2  
466 (#82559) from Addgene. *mir152* specific sgRNAs were designed with CRISPRdirect  
467 (<https://crispr.dbcls.jp/>), named as sgRNA-1 (5'-TCTGTGATACACTCCGACTC-3'), sgRNA-2  
468 (5'-GCTCGGCCCGCTGTCCCCC-3') and sgRNA-3 (5'-TGACAGAACTTGGGCCCGGA-3').  
469 sgRNAs were cloned to plasmids as previously published<sup>48</sup>. All the three plasmid-sgRNA  
470 combinations plus empty plasmids were transfected to hek293T cells with SuperFect (QIAGEN)  
471 following the fabricant's protocol. After 48h post transfection, cells were checked by fluorescent  
472 microscopy to visualize GFP expression and GFP-positive cells were sorted with the BD FACS

473 Aria II and BD FACS Diva software and then pelleted to simultaneous DNA, RNA and protein  
474 extraction using TriPrep kit (MN).

475

476 *cDNA synthesis and Real time quantitative PCRs*

477

478 RNA samples were submitted to cDNA synthesis for miRNA using the NCode miRNA  
479 First-Strand cDNA Synthesis kit (LifeTechnologies, USA) and recommended protocols.  
480 RTqPCR were performed using Fast SYBRGreen MasterMix (ThermoFisher) and *mir152*  
481 specific primers with NCode miRNA First-Strand cDNA Synthesis qPCR Universal Primer in a  
482 fast mode SybrGreen reaction at the QuantStudio 5 (ThermoFisher). We used *RNU6B* and  
483 *RNU44* as endogenous controls. Relative expression values were calculated using the Delta  
484 Delta Ct method as previously reported <sup>49</sup>. For mRNA cDNA synthesis, we used the same total  
485 RNA (1ug) as inputs for the SuperScript IV First-Strand Synthesis System (ThermoFisher) and  
486 specific primers for human *CDH1* (Forward Sequence: 5'-CCATTCAGTACAACGCCCAACCC-  
487 3', Reverse Sequence: 5'-CACAGTCACACACGCTGACCTC-3'), *DNMT1* (Forward Sequence:  
488 5'-TATCCGAGGAGGGCTACCTG-3', Reverse Sequence: 5'-CTGCCATTCCCACTCTACGG-3')  
489 and *TBP* (Forward Sequence: 5'-GTGACCCAGCATCACTGTTTC-3', Reverse Sequence: 5'-  
490 GCAAACCAGAAACCCTTGCG-3') and *HPRT1* (Forward Sequence: 5'-  
491 CCTGGCGTCGTGATTAGTGAT-3', Reverse Sequence: 5'-AGACGTTTCAGTCCTGTCCATAA-  
492 3') as endogenous controls, as well as zebrafish specific primers for *cdh1* (Forward Sequence:  
493 5'-TGTGACTGCAAAGGAGAGGC-3', Reverse Sequence: 5'-  
494 GAGCAGAAGAAGAGCAAGCAATAG-3') , *dnmt1* (Forward Sequence: 5'-  
495 TGTTACTTTGGGCAAGAGGAGAG-3', Reverse Sequence: 5'-AGTGGTGGTGGCTTTAGTCG-  
496 3') and *rpl13a* (Forward Sequence: 5'-TCTGGAGGACTGTAAGAGGTATGC-3', Reverse  
497 Sequence: 5'-AGACGCACAATCTTGAGAGCAG-3') and *beta-actin* (Forward Sequence: 5'-  
498 CGAGCTGTCTTCCCATCCA-3', Reverse Sequence: 5'-TCACCAACGTAGCTGTCTTTCTG-3')

499 as endogenous controls, in a SybrGreen reaction at the QuantStudio 5 (Thermofisher) or  
500 conventional PCR. For zebrafish *mir152* quantification we used Taqman microRNA assay and  
501 probes for dre-*mir152* and rnu6, following the manufacturer's recommendations.

502

#### 503 *Bisulfite sequencing on hek293T transfected cells*

504

505 For *mir152* methylation analysis after pPlatTET1-GFP plasmid transfections in hek293T  
506 cells, we applied traditional bisulfite sequencing method, consisted of bisulfite conversion of 1ug  
507 of genomic DNA and PCR amplification of *mir152* region using the method above described.  
508 PCR products cloning into pGEM-T-easy vector system (Promega). We Sanger sequenced 10  
509 colonies per sample using M13 primers using the above described method and results were  
510 analysed with BISMA online tool (Bisulfite Sequencing DNA Methylation Analysis -  
511 <http://services.abc.uni-stuttgart.de/BDPC/BISMA/>)<sup>50</sup> with default parameters.

512

#### 513 *Injection of mirna mimics and inhibitor in zebrafish embryos and hypoxia tests*

514

515 We performed crossings of both AB and sox10-GFP zebrafish lineages and embryos  
516 were collected in E3 medium. Specific Mirna mimics and inhibitor for *mir152* were purchased  
517 from mirVana Thermofisher Scientific. Embryos at the 1-cell stage were injected with 2nl of  
518 25uM dre-*mir152* mimics, 25uM dre-*mir152* inhibitor, 25uM dre-mimics + inhibitor or TE.  
519 Injected embryos were then raised for up to 5 days in E3 medium at 29oC and 12h/12h  
520 light/dark cycle. 24hpf injected embryos were collected for RNA extraction and subsequent  
521 cDNA synthesis and RTqPCR following the protocols above mentioned, for confocal microscopy  
522 imaging or for cell dissociation followed by GFP-positive cell sorting. Pools of 20 embryos at  
523 24hpf were used for cell dissociation following published methods<sup>51</sup> and GFP-positive cells  
524 were sorted using BD FACS Aria II and BD FACS Diva software. Larvae at 5dpf were collected

525 and fixed in 4% PFA followed by alcian blue staining for craniofacial cartilages phenotyping  
526 using previously published protocols<sup>52</sup>. To study hypoxia effects on zebrafish embryos, we  
527 exposed 1-cell stage zebrafish embryos for 24h or 48h in a 1% O<sub>2</sub> incubator (Hera Cell -  
528 ThermoFisher).

529

### 530 **Acknowledgements**

531

532 We are thankful to Dr. Passos-Bueno members for help in discussions and lab organization. We  
533 thanks to Patrícia Semedo for helping with cell sorting. This work was supported by  
534 FAPESP/CEPID 2013/08028-1, FAPESP 2017/11430-7 (LA), 2016/23648-4 (LAB) and CNPq  
535 305405/2011-5 (MRPB) research fellowships.

536

### 537 **Author disclosure statement**

538 The authors declare that they have no conflict of interest.

539

540

### 541 **Reference**

542 Bibliography

543 1. Mossey, P.A., Little, J., Munger, R.G., Dixon, M.J., and Shaw, W.C. (2009). Cleft lip and  
544 palate. *Lancet* 374, 1773–1785.

545 2. WHO Registry Meeting on Craniofacial Anomalies (2001 : Bauru, Brazil), Mossey, P.A.,  
546 Catilla, E.E., WHO Human Genetics Programme, and WHO Meeting on International  
547 Collaborative Research on Craniofacial Anomalies (3rd : 2001 : Bauru, Brazil) (2003). Global  
548 registry and database on craniofacial anomalies : report of a WHO Registry Meeting on  
549 Craniofacial Anomalies.

550 3. Stanier, P., and Moore, G.E. (2004). Genetics of cleft lip and palate: syndromic genes  
551 contribute to the incidence of non-syndromic clefts. *Hum. Mol. Genet.* 13 *Spec No 1*, R73-81.

552 4. Hu, D.N., Li, J.H., Chen, H.Y., Chang, H.S., Wu, B.X., Lu, Z.K., Wang, D.Z., and Liu, X.G.  
553 (1982). Genetics of cleft lip and cleft palate in China. *Am. J. Hum. Genet.* 34, 999–1002.

- 554 5. Brito, L.A., Cruz, L.A., Rocha, K.M., Barbara, L.K., Silva, C.B.F., Bueno, D.F., Agüena, M.,  
555 Bertola, D.R., Franco, D., Costa, A.M., et al. (2011). Genetic contribution for non-syndromic cleft  
556 lip with or without cleft palate (NS CL/P) in different regions of Brazil and implications for  
557 association studies. *Am. J. Med. Genet. A* 155A, 1581–1587.
- 558 6. Groesen, D., Bille, C., Petersen, I., Skytthe, A., Hjelmborg, J. von B., Pedersen, J.K., Murray,  
559 J.C., and Christensen, K. (2011). Risk of oral clefts in twins. *Epidemiology* 22, 313–319.
- 560 7. Yu, Y., Zuo, X., He, M., Gao, J., Fu, Y., Qin, C., Meng, L., Wang, W., Song, Y., Cheng, Y., et  
561 al. (2017). Genome-wide analyses of non-syndromic cleft lip with palate identify 14 novel loci  
562 and genetic heterogeneity. *Nat. Commun.* 8, 14364.
- 563 8. Ludwig, K.U., Böhmer, A.C., Bowes, J., Nikolic, M., Ishorst, N., Wyatt, N., Hammond, N.L.,  
564 Gözl, L., Thieme, F., Barth, S., et al. (2017). Imputation of orofacial clefting data identifies novel  
565 risk loci and sheds light on the genetic background of cleft lip ± cleft palate and cleft palate only.  
566 *Hum. Mol. Genet.* 26, 829–842.
- 567 9. Holzinger, E.R., Li, Q., Parker, M.M., Hetmanski, J.B., Marazita, M.L., Mangold, E., Ludwig,  
568 K.U., Taub, M.A., Begum, F., Murray, J.C., et al. (2017). Analysis of sequence data to identify  
569 potential risk variants for oral clefts in multiplex families. *Mol. Genet. Genomic Med.* 5, 570–579.
- 570 10. Basha, M., Demeer, B., Revencu, N., Helaers, R., Theys, S., Bou Saba, S., Boute, O.,  
571 Devauchelle, B., Francois, G., Bayet, B., et al. (2018). Whole exome sequencing identifies  
572 mutations in 10% of patients with familial non-syndromic cleft lip and/or palate in genes mutated  
573 in well-known syndromes. *J. Med. Genet.* 55, 449–458.
- 574 11. Pengelly, R.J., Arias, L., Martínez, J., Upstill-Goddard, R., Seaby, E.G., Gibson, J., Ennis,  
575 S., Collins, A., and Briceño, I. (2016). Deleterious coding variants in multi-case families with  
576 non-syndromic cleft lip and/or palate phenotypes. *Sci. Rep.* 6, 30457.
- 577 12. Aylward, A., Cai, Y., Lee, A., Blue, E., Rabinowitz, D., Haddad, J., and University of  
578 Washington Center for Mendelian Genomics (2016). Using whole exome sequencing to identify  
579 candidate genes with rare variants in nonsyndromic cleft lip and palate. *Genet. Epidemiol.* 40,  
580 432–441.
- 581 13. Brito, L.A., Yamamoto, G.L., Melo, S., Malcher, C., Ferreira, S.G., Figueiredo, J., Alvizi, L.,  
582 Kobayashi, G.S., Naslavsky, M.S., Alonso, N., et al. (2015). Rare Variants in the Epithelial  
583 Cadherin Gene Underlying the Genetic Etiology of Nonsyndromic Cleft Lip with or without Cleft  
584 Palate. *Hum. Mutat.* 36, 1029–1033.
- 585 14. Savastano, C.P., Brito, L.A., Faria, Á.C., Setó-Salvia, N., Peskett, E., Musso, C.M., Alvizi, L.,  
586 Ezquina, S.A.M., James, C., GOSgene, et al. (2017). Impact of rare variants in ARHGAP29 to  
587 the etiology of oral clefts: role of loss-of-function vs missense variants. *Clin. Genet.* 91, 683–  
588 689.
- 589 15. Cox, L.L., Cox, T.C., Moreno Uribe, L.M., Zhu, Y., Richter, C.T., Nidey, N., Standley, J.M.,  
590 Deng, M., Blue, E., Chong, J.X., et al. (2018). Mutations in the Epithelial Cadherin-p120-Catenin  
591 Complex Cause Mendelian Non-Syndromic Cleft Lip with or without Cleft Palate. *Am. J. Hum.*  
592 *Genet.* 102, 1143–1157.
- 593 16. Leiby, K.D., Tan, F., and Brown, C.P. (2010). Maternal factors and disparities associated



- 594 with oral clefts. *Ethn. Dis.* 20, S1-146.
- 595 17. Métneki, J., Puhó, E., and Czeizel, A.E. (2005). Maternal diseases and isolated orofacial  
596 clefts in Hungary. *Birth Defects Res. Part A Clin. Mol. Teratol.* 73, 617–623.
- 597 18. Jia, Z.L., Shi, B., Chen, C.H., Shi, J.Y., Wu, J., and Xu, X. (2011). Maternal malnutrition,  
598 environmental exposure during pregnancy and the risk of non-syndromic orofacial clefts. *Oral*  
599 *Dis.* 17, 584–589.
- 600 19. Acuña-González, G., Medina-Solís, C.E., Maupomé, G., Escoffie-Ramírez, M., Hernández-  
601 Romano, J., Márquez-Corona, M. de L., Islas-Márquez, A.J., and Villalobos-Rodelo, J.J. (2011).  
602 Family history and socioeconomic risk factors for non-syndromic cleft lip and palate: a matched  
603 case-control study in a less developed country. *Biomedica* 31, 381–391.
- 604 20. Meyer, K.A., Williams, P., Hernandez-Diaz, S., and Cnattingius, S. (2004). Smoking and the  
605 risk of oral clefts. *Epidemiology* 15, 671–678.
- 606 21. Shahrukh Hashmi, S., Gallaway, M.S., Waller, D.K., Langlois, P.H., Hecht, J.T., and  
607 National Birth Defects Prevention Study (2010). Maternal fever during early pregnancy and the  
608 risk of oral clefts. *Birth Defects Res. Part A Clin. Mol. Teratol.* 88, 186–194.
- 609 22. Waller, D.K., Hashmi, S.S., Hoyt, A.T., Duong, H.T., Tinker, S.C., Gallaway, M.S., Olney,  
610 R.S., Finnell, R.H., Hecht, J.T., Canfield, M.A., et al. (2018). Maternal report of fever from cold  
611 or flu during early pregnancy and the risk for noncardiac birth defects, National Birth Defects  
612 Prevention Study, 1997-2011. *Birth Defects Res.* 110, 342–351.
- 613 23. Bánhidly, F., Acs, N., Puhó, E.H., and Czeizel, A.E. (2010). A possible association of  
614 periodontal infectious diseases in pregnant women with isolated orofacial clefts in their children:  
615 A population-based case-control study. *Birth Defects Res. Part A Clin. Mol. Teratol.* 88, 466–  
616 473.
- 617 24. Alvizi, L., Ke, X., Brito, L.A., Seselgyte, R., Moore, G.E., Stanier, P., and Passos-Bueno,  
618 M.R. (2017). Differential methylation is associated with non-syndromic cleft lip and palate and  
619 contributes to penetrance effects. *Sci. Rep.* 7, 2441.
- 620 25. Howe, L.J., Richardson, T.G., Arathimos, R., Alvizi, L., Passos-Bueno, M.R., Stanier, P.,  
621 Nohr, E., Ludwig, K.U., Mangold, E., Knapp, M., et al. (2019). Evidence for DNA methylation  
622 mediating genetic liability to non-syndromic cleft lip/palate. *Epigenomics* 11, 133–145.
- 623 26. Sharp, G.C., Ho, K., Davies, A., Stergiakouli, E., Humphries, K., McArdle, W., Sandy, J.,  
624 Davey Smith, G., Lewis, S.J., and Relton, C.L. (2017). Distinct DNA methylation profiles in  
625 subtypes of orofacial cleft. *Clin. Epigenetics* 9, 63.
- 626 27. Gonseth, S., Shaw, G.M., Roy, R., Segal, M.R., Asrani, K., Rine, J., Wiemels, J., and Marini,  
627 N.J. (2019). Epigenomic profiling of newborns with isolated orofacial clefts reveals widespread  
628 DNA methylation changes and implicates metastable epiallele regions in disease risk.  
629 *Epigenetics* 14, 198–213.
- 630 28. Tammen, S.A., Friso, S., and Choi, S.-W. (2013). Epigenetics: the link between nature and  
631 nurture. *Mol. Aspects Med.* 34, 753–764.
- 632 29. Jaenisch, R., and Bird, A. (2003). Epigenetic regulation of gene expression: how the

- 633 genome integrates intrinsic and environmental signals. *Nat. Genet.* 33 *Suppl*, 245–254.
- 634 30. Moosavi, A., and Motevalizadeh Ardekani, A. (2016). Role of epigenetics in biology and  
635 human diseases. *Iran. Biomed. J.* 20, 246–258.
- 636 31. Zoghbi, H.Y., and Beaudet, A.L. (2016). Epigenetics and human disease. *Cold Spring Harb.*  
637 *Perspect. Biol.* 8, a019497.
- 638 32. Bird, A. (2007). Perceptions of epigenetics. *Nature* 447, 396–398.
- 639 33. Feil, R., and Fraga, M.F. (2012). Epigenetics and the environment: emerging patterns and  
640 implications. *Nat. Rev. Genet.* 13, 97–109.
- 641 34. Fyfe, I. (2018). Alzheimer disease: Epigenetics links ageing with Alzheimer disease. *Nat.*  
642 *Rev. Neurol.* 14, 254.
- 643 35. Ligthart, S., Marzi, C., Aslibekyan, S., Mendelson, M.M., Conneely, K.N., Tanaka, T.,  
644 Colicino, E., Waite, L.L., Joehanes, R., Guan, W., et al. (2016). DNA methylation signatures of  
645 chronic low-grade inflammation are associated with complex diseases. *Genome Biol.* 17, 255.
- 646 36. Chambers, J.C., Loh, M., Lehne, B., Drong, A., Kriebel, J., Motta, V., Wahl, S., Elliott, H.R.,  
647 Rota, F., Scott, W.R., et al. (2015). Epigenome-wide association of DNA methylation markers in  
648 peripheral blood from Indian Asians and Europeans with incident type 2 diabetes: a nested  
649 case-control study. *Lancet Diabetes Endocrinol.* 3, 526–534.
- 650 37. Florath, I., Butterbach, K., Heiss, J., Bewerunge-Hudler, M., Zhang, Y., Schöttker, B., and  
651 Brenner, H. (2016). Type 2 diabetes and leucocyte DNA methylation: an epigenome-wide  
652 association study in over 1,500 older adults. *Diabetologia* 59, 130–138.
- 653 38. Montano, C., Taub, M.A., Jaffe, A., Briem, E., Feinberg, J.I., Trygvadottir, R., Idrizi, A.,  
654 Runarsson, A., Berndsen, B., Gur, R.C., et al. (2016). Association of DNA Methylation  
655 Differences With Schizophrenia in an Epigenome-Wide Association Study. *JAMA Psychiatry* 73,  
656 506–514.
- 657 39. Liu, Y., Aryee, M.J., Padyukov, L., Fallin, M.D., Hesselberg, E., Runarsson, A., Reinius, L.,  
658 Acevedo, N., Taub, M., Ronninger, M., et al. (2013). Epigenome-wide association data implicate  
659 DNA methylation as an intermediary of genetic risk in rheumatoid arthritis. *Nat. Biotechnol.* 31,  
660 142–147.
- 661 40. Rakyan, V.K., Down, T.A., Balding, D.J., and Beck, S. (2011). Epigenome-wide association  
662 studies for common human diseases. *Nat. Rev. Genet.* 12, 529–541.
- 663 41. Gilsbach, R., Schwaderer, M., Preissl, S., Grüning, B.A., Kranzhöfer, D., Schneider, P.,  
664 Nührenberg, T.G., Mulero-Navarro, S., Weichenhan, D., Braun, C., et al. (2018). Distinct  
665 epigenetic programs regulate cardiac myocyte development and disease in the human heart in  
666 vivo. *Nat. Commun.* 9, 391.
- 667 42. Barbosa, M., Joshi, R.S., Garg, P., Martin-Trujillo, A., Patel, N., Jadhav, B., Watson, C.T.,  
668 Gibson, W., Chetnik, K., Tessereau, C., et al. (2018). Identification of rare de novo epigenetic  
669 variations in congenital disorders. *Nat. Commun.* 9, 2064.
- 670 43. Assenov, Y., Müller, F., Lutsik, P., Walter, J., Lengauer, T., and Bock, C. (2014).  
671 Comprehensive analysis of DNA methylation data with RnBeads. *Nat. Methods* 11, 1138–1140.

- 672 44. Masser, D.R., Berg, A.S., and Freeman, W.M. (2013). Focused, high accuracy 5-  
673 methylcytosine quantitation with base resolution by benchtop next-generation sequencing.  
674 *Epigenetics Chromatin* 6, 33.
- 675 45. Masser, D.R., Stanford, D.R., and Freeman, W.M. (2015). Targeted DNA methylation  
676 analysis by next-generation sequencing. *J. Vis. Exp.*
- 677 46. Wojdacz, T.K., Hansen, L.L., and Dobrovic, A. (2008). A new approach to primer design for  
678 the control of PCR bias in methylation studies. *BMC Res. Notes* 1, 54.
- 679 47. Lutsik, P., Feuerbach, L., Arand, J., Lengauer, T., Walter, J., and Bock, C. (2011). BiQ  
680 Analyzer HT: locus-specific analysis of DNA methylation by high-throughput bisulfite  
681 sequencing. *Nucleic Acids Res.* 39, W551-6.
- 682 48. Morita, S., Noguchi, H., Horii, T., Nakabayashi, K., Kimura, M., Okamura, K., Sakai, A.,  
683 Nakashima, H., Hata, K., Nakashima, K., et al. (2016). Targeted DNA demethylation in vivo  
684 using dCas9-peptide repeat and scFv-TET1 catalytic domain fusions. *Nat. Biotechnol.* 34,  
685 1060–1065.
- 686 49. Pfaffl, M.W. (2001). A new mathematical model for relative quantification in real-time RT-  
687 PCR. *Nucleic Acids Res.* 29, e45.
- 688 50. Rohde, C., Zhang, Y., Reinhardt, R., and Jeltsch, A. (2010). BISMA--fast and accurate  
689 bisulfite sequencing data analysis of individual clones from unique and repetitive sequences.  
690 *BMC Bioinformatics* 11, 230.
- 691 51. Bresciani, E., Broadbridge, E., and Liu, P.P. (2018). An efficient dissociation protocol for  
692 generation of single cell suspension from zebrafish embryos and larvae. *MethodsX* 5, 1287–  
693 1290.
- 694 52. Favaro, F.P., Alvizi, L., Zechi-Ceide, R.M., Bertola, D., Felix, T.M., de Souza, J., Raskin, S.,  
695 Twigg, S.R.F., Weiner, A.M.J., Armas, P., et al. (2014). A noncoding expansion in EIF4A3  
696 causes Richieri-Costa-Pereira syndrome, a craniofacial disorder associated with limb defects.  
697 *Am. J. Hum. Genet.* 94, 120–128.
- 698 53. Seelan, R.S., Appana, S.N., Mukhopadhyay, P., Warner, D.R., Brock, G.N., Pisano, M.M.,  
699 and Greene, R.M. (2013). Developmental profiles of the murine palatal methylome. *Birth*  
700 *Defects Res. Part A Clin. Mol. Teratol.* 97, 171–186.
- 701 54. Greene, R.M., and Pisano, M.M. (2010). Palate morphogenesis: current understanding and  
702 future directions. *Birth Defects Res. C Embryo Today* 90, 133–154.
- 703 55. Birnbaum, S., Ludwig, K.U., Reutter, H., Herms, S., Steffens, M., Rubini, M., Baluardo, C.,  
704 Ferrian, M., Almeida de Assis, N., Alblas, M.A., et al. (2009). Key susceptibility locus for  
705 nonsyndromic cleft lip with or without cleft palate on chromosome 8q24. *Nat. Genet.* 41, 473–  
706 477.
- 707 56. Brito, L.A., Paranaiba, L.M.R., Bassi, C.F.S., Masotti, C., Malcher, C., Schlesinger, D.,  
708 Rocha, K.M., Cruz, L.A., Bárbara, L.K., Alonso, N., et al. (2012). Region 8q24 is a susceptibility  
709 locus for nonsyndromic oral clefting in Brazil. *Birth Defects Res. Part A Clin. Mol. Teratol.* 94,  
710 464–468.

- 711 57. Chen, L., Ge, B., Casale, F.P., Vasquez, L., Kwan, T., Garrido-Martín, D., Watt, S., Yan, Y.,  
712 Kundu, K., Ecker, S., et al. (2016). Genetic drivers of epigenetic and transcriptional variation in  
713 human immune cells. *Cell* 167, 1398-1414.e24.
- 714 58. Herman, J.J., and Sultan, S.E. (2016). DNA methylation mediates genetic variation for  
715 adaptive transgenerational plasticity. *Proc. Biol. Sci.* 283,.
- 716 59. Theodore, S.C., Davis, M., Zhao, F., Wang, H., Chen, D., Rhim, J., Dean-Colomb, W.,  
717 Turner, T., Ji, W., Zeng, G., et al. (2014). MicroRNA profiling of novel African American and  
718 Caucasian Prostate Cancer cell lines reveals a reciprocal regulatory relationship of miR-152 and  
719 DNA methyltransferase 1. *Oncotarget* 5, 3512–3525.
- 720 60. Sengupta, D., Deb, M., Rath, S.K., Kar, S., Parbin, S., Pradhan, N., and Patra, S.K. (2016).  
721 DNA methylation and not H3K4 trimethylation dictates the expression status of miR-152 gene  
722 which inhibits migration of breast cancer cells via DNMT1/CDH1 loop. *Exp. Cell Res.* 346, 176–  
723 187.
- 724 61. Tang, X.-L., Lin, L., Song, L.-N., and Tang, X.-H. (2016). Hypoxia-inducible miR-152  
725 suppresses the expression of WNT1 and ERBB3, and inhibits the proliferation of cervical cancer  
726 cells. *Exp Biol Med (Maywood)* 241, 1429–1437.
- 727 62. Huang, S., Xie, Y., Yang, P., Chen, P., and Zhang, L. (2014). HCV core protein-induced  
728 down-regulation of microRNA-152 promoted aberrant proliferation by regulating Wnt1 in HepG2  
729 cells. *PLoS ONE* 9, e81730.
- 730 63. Küchler, E.C., Silva, L.A. da, Nelson-Filho, P., Sabóia, T.M., Rentschler, A.M., Granjeiro,  
731 J.M., Oliveira, D., Tannure, P.N., Silva, R.A. da, Antunes, L.S., et al. (2018). Assessing the  
732 association between hypoxia during craniofacial development and oral clefts. *J. Appl. Oral Sci.*  
733 26, e20170234.
- 734 64. Bronsky, P.T., Johnston, M.C., and Sulik, K.K. (1986). Morphogenesis of hypoxia-induced  
735 cleft lip in CL/Fr mice. *J. Craniofac. Genet. Dev. Biol. Suppl.* 2, 113–128.
- 736 65. Millicovsky, G., and Johnston, M.C. (1981). Hyperoxia and hypoxia in pregnancy: simple  
737 experimental manipulation alters the incidence of cleft lip and palate in CL/Fr mice. *Proc Natl*  
738 *Acad Sci USA* 78, 5722–5723.
- 739 66. Finer, S., Mathews, C., Lowe, R., Smart, M., Hillman, S., Foo, L., Sinha, A., Williams, D.,  
740 Rakyan, V.K., and Hitman, G.A. (2015). Maternal gestational diabetes is associated with  
741 genome-wide DNA methylation variation in placenta and cord blood of exposed offspring. *Hum.*  
742 *Mol. Genet.* 24, 3021–3029.
- 743 67. Xu, C.-J., Söderhäll, C., Bustamante, M., Baiz, N., Gruziova, O., Gehring, U., Mason, D.,  
744 Chatzi, L., Basterrechea, M., Llop, S., et al. (2018). DNA methylation in childhood asthma: an  
745 epigenome-wide meta-analysis. *Lancet Respir. Med.* 6, 379–388.
- 746 68. Leenen, F.A.D., Muller, C.P., and Turner, J.D. (2016). DNA methylation: conducting the  
747 orchestra from exposure to phenotype? *Clin. Epigenetics* 8, 92.
- 748 69. McRae, A.F., Marioni, R.E., Shah, S., Yang, J., Powell, J.E., Harris, S.E., Gibson, J.,  
749 Henders, A.K., Bowdler, L., Painter, J.N., et al. (2018). Identification of 55,000 replicated DNA  
750 methylation QTL. *Sci. Rep.* 8, 17605.

- 751 70. Schulz, H., Ruppert, A.-K., Herms, S., Wolf, C., Mirza-Schreiber, N., Stegle, O., Czamara,  
752 D., Forstner, A.J., Sivalingam, S., Schoch, S., et al. (2017). Genome-wide mapping of genetic  
753 determinants influencing DNA methylation and gene expression in human hippocampus. *Nat.*  
754 *Commun.* *8*, 1511.
- 755 71. Liu, X., Li, J., Qin, F., and Dai, S. (2016). miR-152 as a tumor suppressor microRNA: Target  
756 recognition and regulation in cancer. *Oncol. Lett.* *11*, 3911–3916.
- 757 72. Ning, Y.-X., Wang, X.-Y., Wang, J.-Q., Zeng, R., and Wang, G.-Q. (2018). miR- 152  
758 regulates TGF-  $\beta$ 1- induced epithelial- mesenchymal transition by targeting HPIP in tubular  
759 epithelial cells. *Mol. Med. Report.* *17*, 7973–7979.
- 760 73. Frebourg, T., Oliveira, C., Hochain, P., Karam, R., Manouvrier, S., Graziadio, C., Vekemans,  
761 M., Hartmann, A., Baert-Desurmont, S., Alexandre, C., et al. (2006). Cleft lip/palate and  
762 CDH1/E-cadherin mutations in families with hereditary diffuse gastric cancer. *J. Med. Genet.* *43*,  
763 138–142.
- 764 74. Vogelaar, I.P., Figueiredo, J., van Rooij, I.A.L.M., Simões-Correia, J., van der Post, R.S.,  
765 Melo, S., Seruca, R., Carels, C.E.L., Ligtenberg, M.J.L., and Hoogerbrugge, N. (2013).  
766 Identification of germline mutations in the cancer predisposing gene CDH1 in patients with  
767 orofacial clefts. *Hum. Mol. Genet.* *22*, 919–926.
- 768 75. Huang, C., Kratzer, M.-C., Wedlich, D., and Kashef, J. (2016). E-cadherin is required for  
769 cranial neural crest migration in *Xenopus laevis*. *Dev. Biol.* *411*, 159–171.
- 770 76. Dunwoodie, S.L. (2009). The role of hypoxia in development of the Mammalian embryo.  
771 *Dev. Cell* *17*, 755–773.
- 772 77. Huang, L., Chen, X., Dasgupta, C., Chen, W., Song, R., Wang, C., and Zhang, L. (2018).  
773 Fetal hypoxia impacts methylome and transcriptome in developmental programming of heart  
774 disease. *Cardiovasc. Res.*
- 775 78. Webster, W.S., and Abela, D. (2007). The effect of hypoxia in development. *Birth Defects*  
776 *Res. C Embryo Today* *81*, 215–228.
- 777 79. Hutter, D., Kingdom, J., and Jaeggi, E. (2010). Causes and mechanisms of intrauterine  
778 hypoxia and its impact on the fetal cardiovascular system: a review. *Int. J. Pediatr.* *2010*,  
779 401323.
- 780 80. Webster, W.S., Howe, A.M., Abela, D., and Oakes, D.J. (2006). The relationship between  
781 cleft lip, maxillary hypoplasia, hypoxia and phenytoin. *Curr. Pharm. Des.* *12*, 1431–1448.
- 782 81. Smith, F., Hu, D., Young, N.M., Lainoff, A.J., Jamniczky, H.A., Maltepe, E., Hallgrimsson, B.,  
783 and Marcucio, R.S. (2013). The effect of hypoxia on facial shape variation and disease  
784 phenotypes in chicken embryos. *Dis. Model. Mech.* *6*, 915–924.
- 785 82. Millicovsky, G., and Johnston, M.C. (1981). Maternal hyperoxia greatly reduces the  
786 incidence of phenytoin-induced cleft lip and palate in A/J mice. *Science* *212*, 671–672.
- 787 83. Castilla, E.E., Lopez-Camelo, J.S., and Campaña, H. (1999). Altitude as a risk factor for  
788 congenital anomalies. *Am. J. Med. Genet.* *86*, 9–14.
- 789 84. Little, J., Cardy, A., and Munger, R.G. (2004). Tobacco smoking and oral clefts: a meta-

790 analysis. Bull. World Health Organ. 82, 213–218.

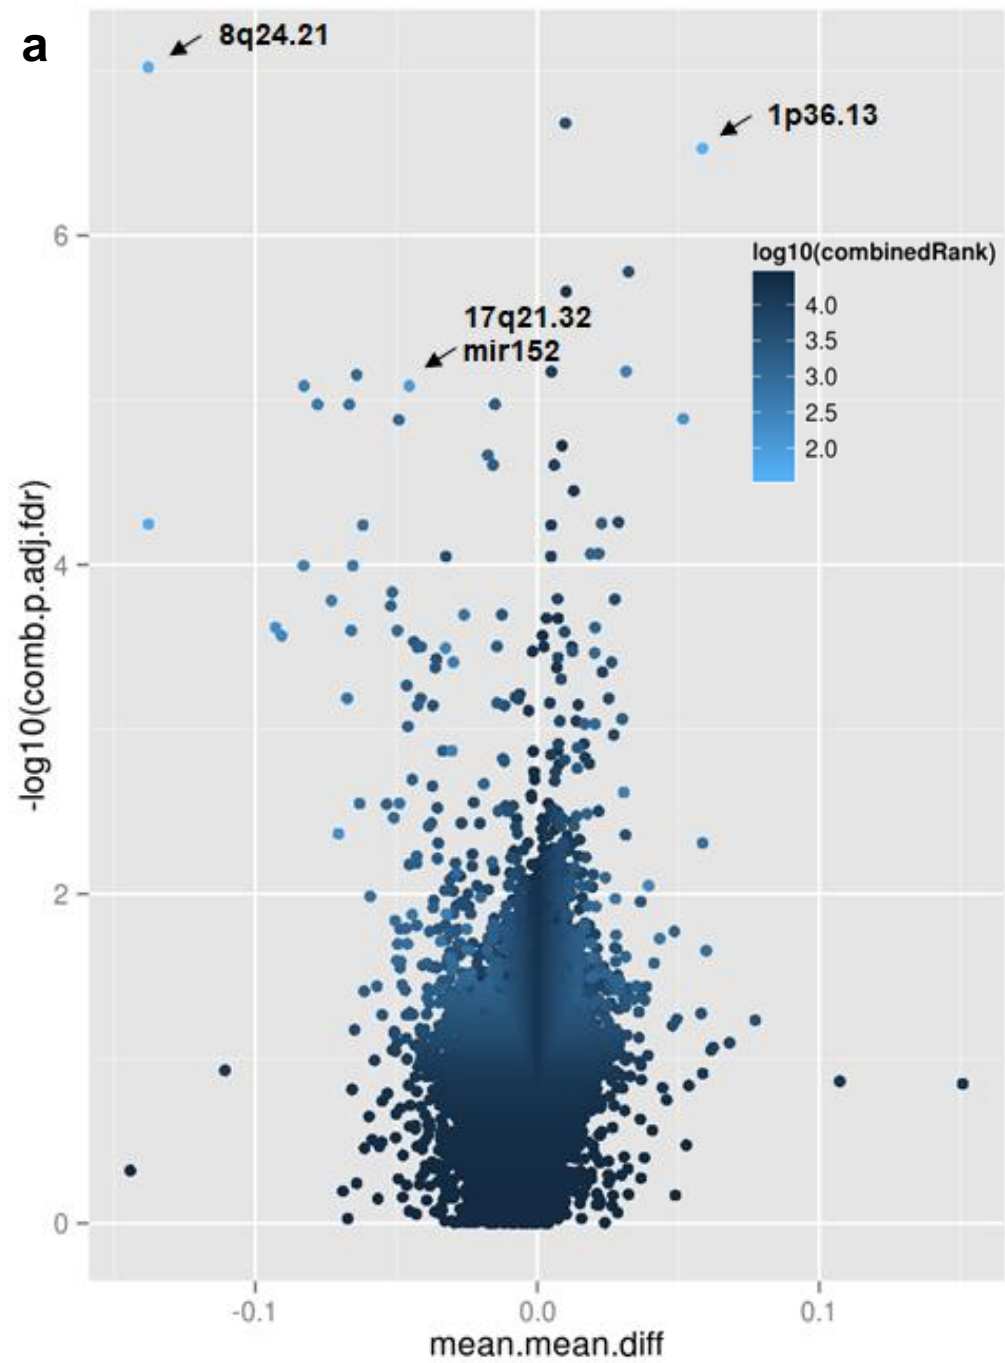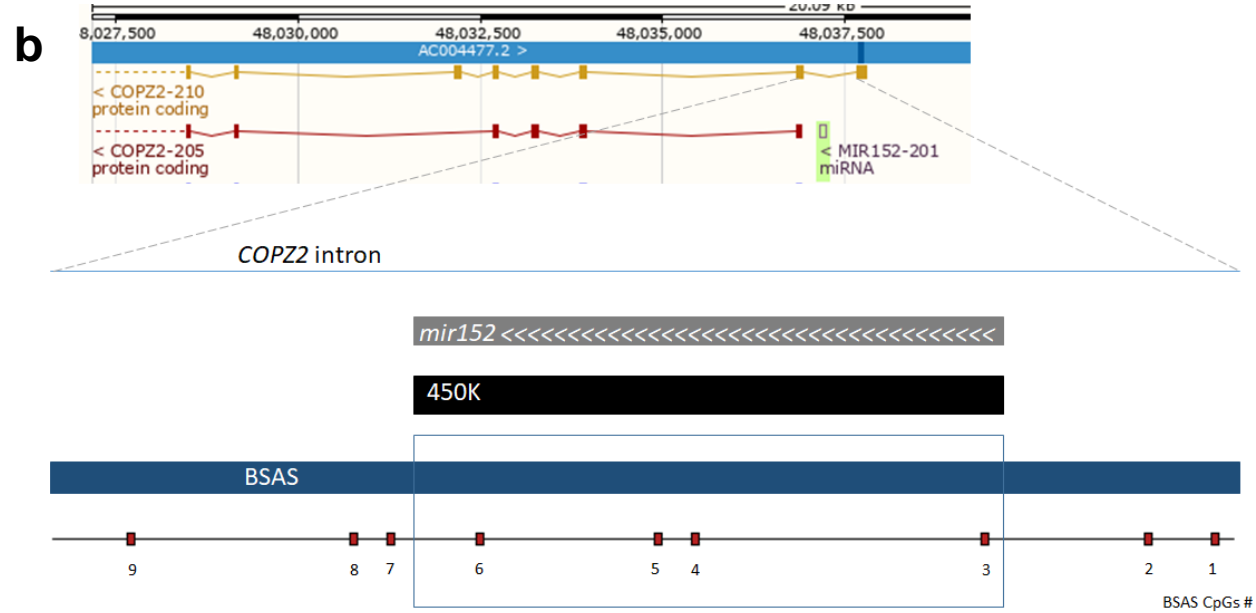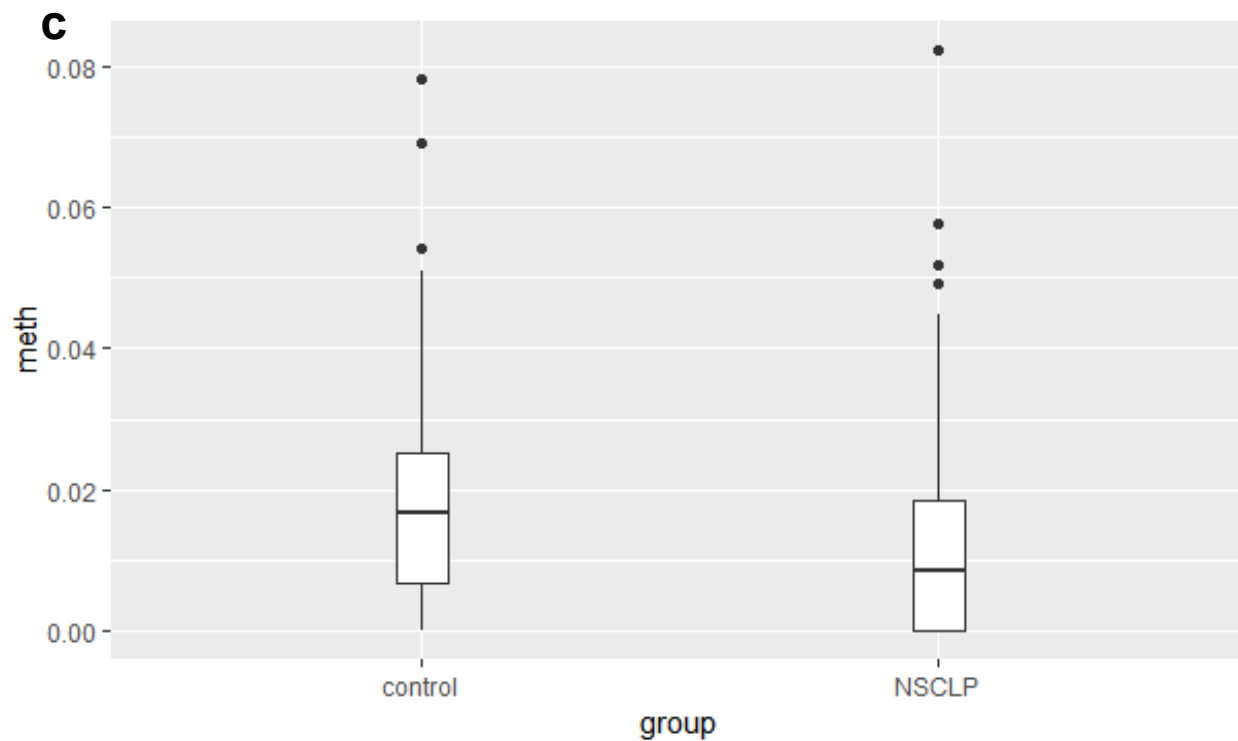

**a**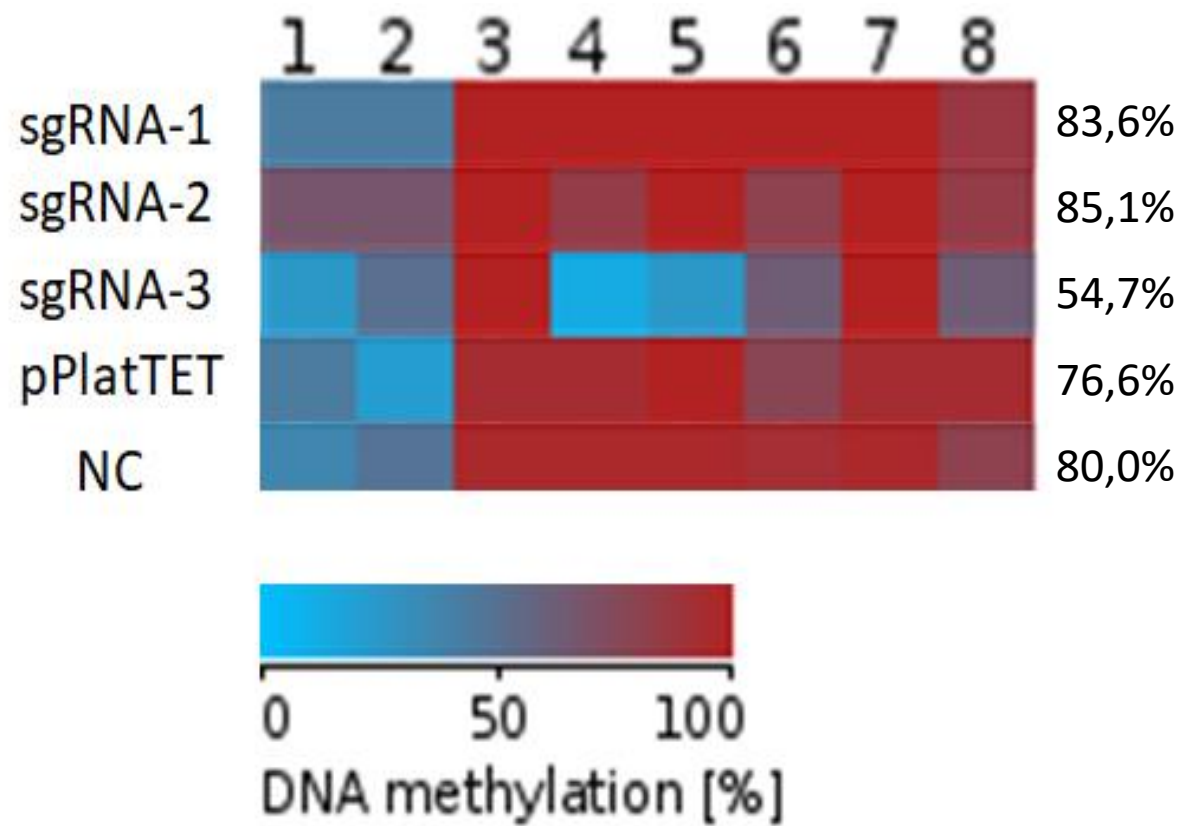**b**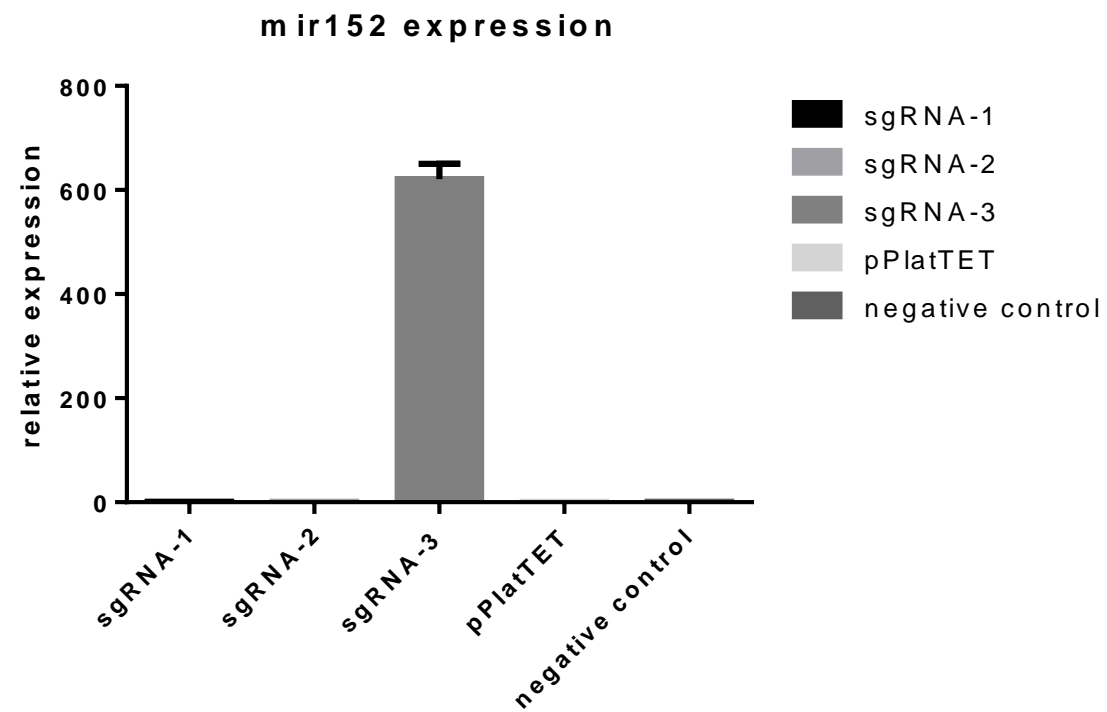



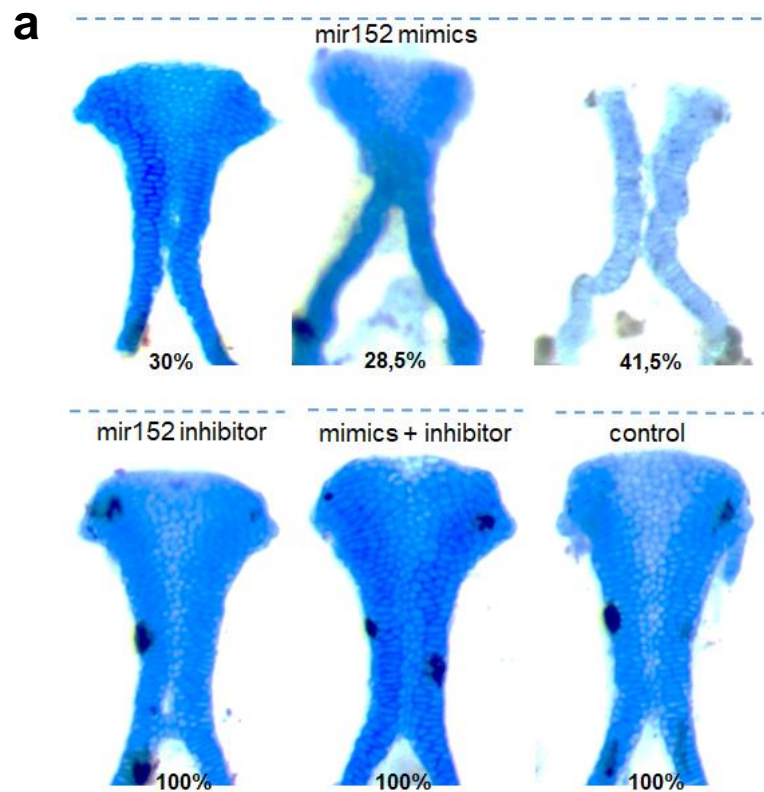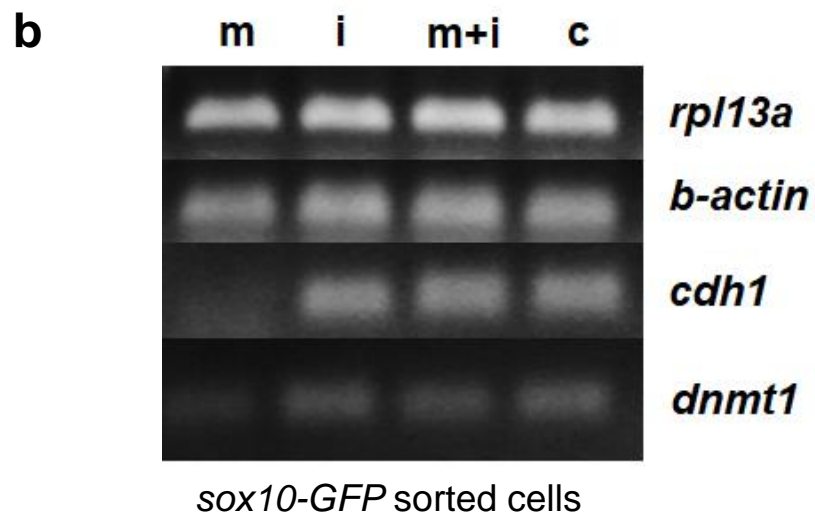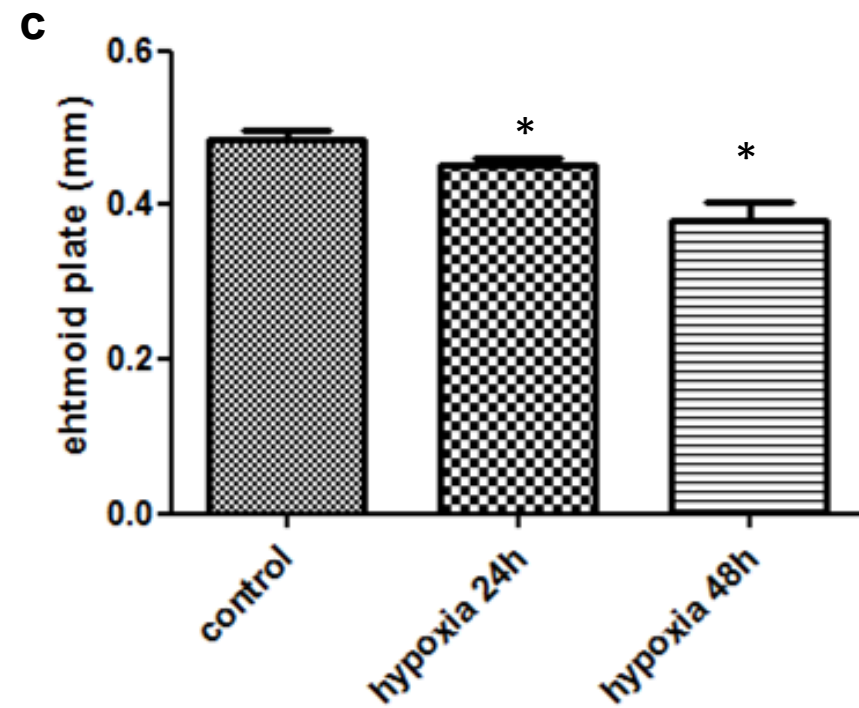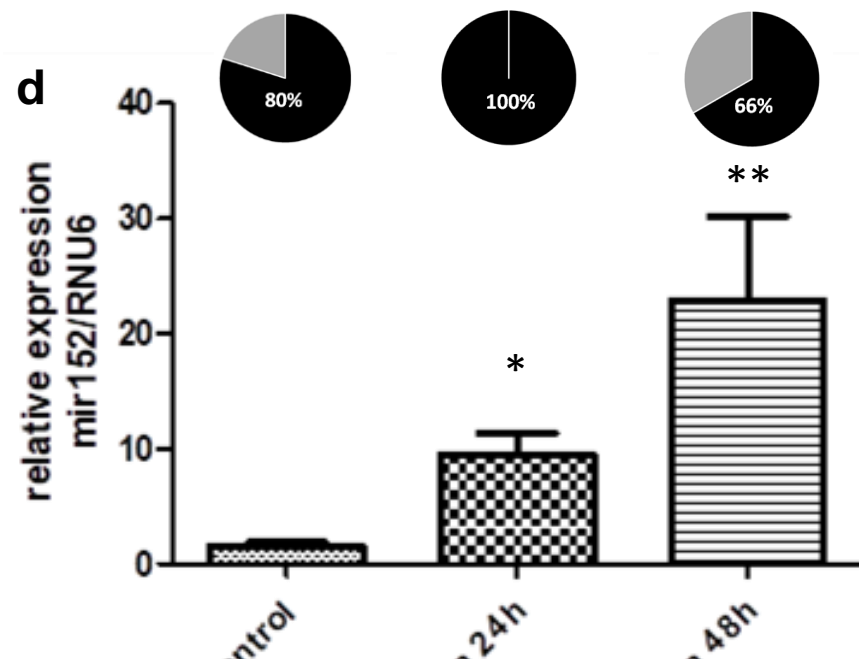

Source: https://www.biorxiv.org/content/10.1101/850016v1.full.pdf
